# Supplementary material
Source: PubMed Central journal article supplement (PMC7206850)
Supplement: hmg_2019_tbw_00493_alankarage_supplement_ddz231.pdf [file hmg_2019_tbw_00493_alankarage_supplement_ddz231.pdf]

Supplementary data for:

**Functional characterisation of a *PBX1* *de novo* missense variant identified in a patient with syndromic congenital heart disease**

Dimuthu Alankarage <sup>1</sup>, Justin Szot <sup>1</sup>, Nick Pachter <sup>2,3</sup>, Anne Slavotinek <sup>4,5</sup>, Licia Selleri <sup>5,6</sup>, Joseph Shieh <sup>4,5</sup>, David Winlaw <sup>1,7,8</sup>, Eleni Giannoulatou <sup>1,9</sup>, Gavin Chapman <sup>1,9</sup>, Sally L. Dunwoodie <sup>1,9\*</sup>

<sup>1</sup> Victor Chang Cardiac Research Institute, Darlinghurst, Sydney, Australia; <sup>2</sup> Genetic Services of Western Australia, King Edward Memorial Hospital, Perth, Australia; <sup>3</sup> University of Western Australia, Perth, Australia; <sup>4</sup> Division of Medical Genetics, Department of Pediatrics, University of California San Francisco, CA, USA; <sup>5</sup> Institute of Human Genetics, University of California San Francisco, CA, USA; <sup>6</sup> Program in Craniofacial Biology, Department of Orofacial Sciences and Department of Anatomy, University of California San Francisco, CA, USA; <sup>7</sup> Heart Centre for Children, The Children's Hospital at Westmead, Sydney, Australia; <sup>8</sup> Faculty of Medicine and Health, University of Sydney, Sydney, Australia; <sup>9</sup> Faculty of Medicine, University of New South Wales, Sydney, Australia.

**Corresponding author**

\* Corresponding author: Tel: +61 2 9295 8613, E-mail: [s.dunwoodie@victorchang.edu.au](mailto:s.dunwoodie@victorchang.edu.au)

Supplementary tables

**Supplementary table 1:** Rare, damaging variants that segregate with disease in family 3467.

| INHERITANCE MODEL            | <i>De novo</i>            |                           | Compound heterozygous                                   |                                                         |
|------------------------------|---------------------------|---------------------------|---------------------------------------------------------|---------------------------------------------------------|
|                              | <i>PBX1</i>               | <i>ESPNL</i>              | <i>OBSCN</i>                                            | <i>ATRN</i>                                             |
| Gene name                    | <i>PBX1</i>               | <i>ESPNL</i>              | <i>OBSCN</i>                                            | <i>ATRN</i>                                             |
| Chromosome                   | CHR1                      | CHR2                      | CHR1                                                    | CHR20                                                   |
| Genomic position†            | 164768976                 | 239039979                 | 228503767;<br>228520630                                 | 3565467;<br>3578621                                     |
| Variant type                 | Non-synonymous            | Non-synonymous            | Non-synonymous;<br>non-synonymous                       | Non-synonymous;<br>non-synonymous                       |
| DNA variant change           | 551G>C                    | 2624G>A                   | 16103G>A;<br>18593A>G                                   | 3124C>T;<br>3538A>G                                     |
| Amino acid change            | R184P                     | R875Q                     | R5368Q;<br>Y6198C                                       | L1042F;<br>I1180V                                       |
| gnomAD Heterozygotes # (MAF) | 0 (0)                     | 3 (0.00001453)            | 13 (0.00005698);<br>14 (0.00004999)                     | 0 (0); 8 (0.00003186)                                   |
| gnomAD Homozygotes #         | 0                         | 0                         | 0; 0                                                    | 0; 0                                                    |
| CADD-PHRED                   | 33                        | 19.98                     | 29.8; 28                                                | 22.1; 27.4                                              |
| PolyPhen2-HVAR (prediction)  | 0.995 (probably damaging) | 0.997 (probably damaging) | 0.976 (probably damaging);<br>0.999 (probably damaging) | 0.992 (probably damaging);<br>0.978 (probably damaging) |

As the proband has sporadic CHD, variants that were *de novo*, recessive and compound heterozygous were considered. They were filtered by minor allele frequency (<0.01) and by predicted pathogenicity by CADD-PHRED (≥15) and Polyphen-HVAR (≥0.446). Two *de novo* variants in genes *PBX1* and *ESPNL* as well as compound heterozygous variants in *OBSCN* and *ATRN* were identified. †Relative to hg19. MAF: Minor Allele Frequency, with respect to gnomAD. PolyPhen2-HVAR: 0 (benign) – 1 (probably damaging). CADD-PHRED: 1-99; ≥10 (top 10% of deleterious mutation); ≥20 (top 1% of deleterious mutation).

**Supplementary table 2.** Phenotype details of patients reported with pathogenic, single gene *PBX1* variants. Patients with missense variants are presented first, followed by patients with loss-of-function alleles.

|                       |                                 | Missense                                                                                                                                 |                          |                                                                   |                                                                                              |                                                                                                                                                                          |                                                                                                                                                                                      |
|-----------------------|---------------------------------|------------------------------------------------------------------------------------------------------------------------------------------|--------------------------|-------------------------------------------------------------------|----------------------------------------------------------------------------------------------|--------------------------------------------------------------------------------------------------------------------------------------------------------------------------|--------------------------------------------------------------------------------------------------------------------------------------------------------------------------------------|
|                       |                                 | Slavotinek, 2017 <sup>a</sup>                                                                                                            |                          |                                                                   |                                                                                              |                                                                                                                                                                          | Eozenou, 2019 <sup>b</sup>                                                                                                                                                           |
| Amino acid position   | R184P <sup>c</sup>              | M224K                                                                                                                                    | R227P                    | R234P                                                             | R235Q                                                                                        | R235Q                                                                                                                                                                    | R235Q                                                                                                                                                                                |
| <b>CHD</b>            | TOF with absent pulmonary valve | PDA, ASD                                                                                                                                 |                          | PDA, pulmonary artery hypertension                                | PDA                                                                                          |                                                                                                                                                                          |                                                                                                                                                                                      |
| <b>Renal/ Urinary</b> | Increased renal echogenicity    |                                                                                                                                          |                          | Increased renal cortical echogenicity, mild left pyelocaliectasis | Bilateral dilated ureters                                                                    |                                                                                                                                                                          |                                                                                                                                                                                      |
| <b>Reproductive</b>   |                                 | DSD (microphallus, prepuce-like opening, splayed labioscrotal appearance, intra-abdominal testicular tissue, persistent mullerian ducts) | Bilateral cryptorchidism |                                                                   | Small scrotum, bilateral cryptorchidism                                                      | Micropenis, cryptorchid right gonad, absent left gonad, uterine didelphys, labial folds with no palpable gonads, 2 perineal openings, vaginal introitus, urethral meatus | Female external genitalia, streak gonads (right gonad, sparse seminiferous tubules, fibrous tissue; left gonad, fibrous tissue), bilateral Fallopian tubes and epididymal structures |
| <b>Skeletal</b>       | Mild clinodactyly               |                                                                                                                                          |                          |                                                                   |                                                                                              |                                                                                                                                                                          | Radiocubital synostosis                                                                                                                                                              |
| <b>Respiratory</b>    | Bronchiolitis                   | Pulmonary hypertension, chronic respiratory failure                                                                                      |                          | Chronic lung disease, pulmonary aspiration                        | Right lung hypoplasia, right eventration of the diaphragm, persistent pulmonary hypertension |                                                                                                                                                                          |                                                                                                                                                                                      |

|                          |                                                                  |                                                                                                        |                           |                                            |                                                                               |      |      |
|--------------------------|------------------------------------------------------------------|--------------------------------------------------------------------------------------------------------|---------------------------|--------------------------------------------|-------------------------------------------------------------------------------|------|------|
| <b>Digestive</b>         |                                                                  | Feeding intolerance, oral motor dysfunction, gastroesophageal reflux disease, pancreatic insufficiency |                           | Gastrointestinal reflux disease, dysphagia |                                                                               |      |      |
| <b>Craniofacial</b>      | Broad nasal tip, thick lips, prominent philtrum, anteverted ears | Esotropia (left eye)                                                                                   | Strabismus, sacral dimple |                                            | Blue sclera, ear microtia, prominent nuchal folds, micrognathia               |      |      |
| <b>Nervous system</b>    | Autism                                                           | Hypoplasia of corpus callosum, parenchymal volume loss, diffuse hypotonia, dysautonomia                |                           | Hypotonia                                  | Cortical hyperintensity, cerebellar microhaemorrhages, mild subdural hematoma |      |      |
| <b>Growth/size/body</b>  |                                                                  | Global developmental delay                                                                             | Gross motor delay         | Global developmental delay                 |                                                                               |      |      |
| <b>Other<sup>d</sup></b> |                                                                  | Thrombocytopenia                                                                                       | Hemangioma                |                                            | Nail bed hypoplasia, nuchal cystic hygroma                                    |      |      |
| <b>Sex</b>               | Male                                                             | Male                                                                                                   | Male                      | Female                                     | Male                                                                          | Male | Male |

LOF

|                            | Riedhammer, 2017 <sup>e</sup>           | Heidet, 2017 <sup>f</sup> |                                   | Slavotinek, 2017 <sup>a</sup>                                                  |                                               | Le Tanno, 2017 <sup>g</sup>                                                                      |                                                                        | Heidet, 2017 <sup>f</sup>          |                                    |
|----------------------------|-----------------------------------------|---------------------------|-----------------------------------|--------------------------------------------------------------------------------|-----------------------------------------------|--------------------------------------------------------------------------------------------------|------------------------------------------------------------------------|------------------------------------|------------------------------------|
| <b>Amino acid position</b> | G138Vfs*40                              | N143Tfs*37                | R184*                             | S262Qfs*2                                                                      | R288*                                         | 1.5Mb deletion (only <i>PBX1</i> )                                                               | 0.276 MB deletion (only <i>PBX1</i> )                                  | Deletion of one <i>PBX1</i> allele | Deletion of one <i>PBX1</i> allele |
| <b>CHD</b>                 |                                         |                           |                                   |                                                                                | Ebstein anomaly                               |                                                                                                  |                                                                        |                                    |                                    |
| <b>Renal/ Urinary</b>      | Small hyperechogenic kidneys            | Renal hypoplasia          | Hyperechogenic kidneys with cysts | Renal hypoplasia, increased renal cortex echogenicity, malrotated right kidney | Hypoplastic kidneys, urinary tract infections | Bilateral renal hypoplasia, hyperechogenicity                                                    | Bilateral renal hypoplasia, right renal ectopia, right renal dysplasia | Small dysplastic horseshoe kidney  | Single hyperechogenic kidney       |
| <b>Reproductive</b>        | Bilateral cryptorchidism                |                           |                                   | Small labia minora                                                             |                                               | Bilateral cryptorchidism                                                                         | Right cryptorchidism                                                   |                                    |                                    |
| <b>Skeletal</b>            | Short clavicles, bilateral clinodactyly | Scoliosis                 |                                   |                                                                                | Mild brachydactyly, slender fingers and toes  | Shoulder blade anomaly, acromioclavicular joint, skull basis, vertebral defects, hip dislocation | Joint laxity                                                           |                                    |                                    |
| <b>Respiratory</b>         |                                         |                           |                                   |                                                                                | Upper airway infections                       |                                                                                                  |                                                                        |                                    |                                    |
| <b>Digestive</b>           |                                         |                           |                                   | Type 1 choledochal cyst                                                        | Constipation                                  |                                                                                                  |                                                                        |                                    |                                    |

|                          |                                                                    |          |                                         |                                                                                                                                                                                                                                                                              |                                                                                                                                                                                                                                                                     |                                                                                                             |                                                                          |          |                                                                         |
|--------------------------|--------------------------------------------------------------------|----------|-----------------------------------------|------------------------------------------------------------------------------------------------------------------------------------------------------------------------------------------------------------------------------------------------------------------------------|---------------------------------------------------------------------------------------------------------------------------------------------------------------------------------------------------------------------------------------------------------------------|-------------------------------------------------------------------------------------------------------------|--------------------------------------------------------------------------|----------|-------------------------------------------------------------------------|
| <b>Craniofacial</b>      | Wide nasal bridge, short neck, bilateral over folding of the helix | Deafness | Long narrow face                        | Hearing loss, microtia, hypoplastic ear helices with bilateral absence of tragus, attached earlobes, stenosis of external auditory canals, wide lateral eyebrows, upslanted palpebral fissures, epicanthal folds, flat nasal bridge, thin philtrum, narrow palate, small jaw | Low anterior and posterior hairlines, coarse hair, deep-set eyes, a short philtrum, an exaggerated cupid's bow, bifid uvula, posteriorly rotated ears with attached earlobes and small external auditory canals, a prominent mandible, a sacral dimple, genu valgum | Bilateral ear dysplasia, divergent strabismus, short nose, anteverted nares, prominent philtrum, short neck | Bilateral conductive hearing loss, bilateral ear dysplasia               | Deafness | Microcephaly, facial dysmorphism (long narrow face, abnormal ear lobes) |
| <b>Nervous system</b>    |                                                                    |          |                                         | Mild truncal and axial hypotonia                                                                                                                                                                                                                                             | Autism                                                                                                                                                                                                                                                              | Hypotonia                                                                                                   |                                                                          |          |                                                                         |
| <b>Growth/size/body</b>  | Global developmental delay                                         |          | Developmental delay, growth retardation | Mild motor delay                                                                                                                                                                                                                                                             | Truncal obesity with slender extremities, delayed psychomotor development                                                                                                                                                                                           | Motor delay                                                                                                 | Global developmental delay, global motor delay, autism spectrum disorder |          | Developmental delay                                                     |
| <b>Other<sup>d</sup></b> |                                                                    |          |                                         | Asymmetric gluteal cleft                                                                                                                                                                                                                                                     | Otitis media, pes planovalgus (flat feet)                                                                                                                                                                                                                           |                                                                                                             |                                                                          |          |                                                                         |
| <b>Sex</b>               | Male                                                               | Female   | Female                                  | Female                                                                                                                                                                                                                                                                       | Female                                                                                                                                                                                                                                                              | Male                                                                                                        | Male                                                                     | Female   | Male                                                                    |

(<sup>a</sup>Slavotinek et al., 2017 (1), <sup>b</sup>Eozenou et al., 2019 (2), <sup>c</sup>Current manuscript, <sup>e</sup>Riedhammer et al., 2017 (3), <sup>f</sup>Heidet et al., 2017 (4), <sup>g</sup>Le Tanno et al., 2017 (5)). <sup>d</sup>Other include phenotypes that do not fall within any other category.

## Supplementary figures

A

```

PBX1_HUMAN MDEQPRLMHSAGVGMAGHPGLSQHLQDGAGGTEGEGGRKQDIGDILQQIMTITDQSLDE 60
PBX1_MOUSE MDEQPRLMHSAGVGMAGHPGLSQHLQDGAGGTEGEGGRKQDIGDILQQIMTITDQSLDE 60
*****

PBX1_HUMAN AQAARKHALNCHRMKPALFNVLCEIKEKTVLSIRGAQEEEPDTPQLMRLDNMLLAEGVAGP 120
PBX1_MOUSE AQAARKHALNCHRMKPALFNVLCEIKEKTVLSIRGAQEEEPDTPQLMRLDNMLLAEGVAGP 120
*****

PBX1_HUMAN EKGGSAAAAAAAAASGGAGSDNSVEHSDYRAKLSQIRQIYHTELEKYEQACNEFTTHVM 180
PBX1_MOUSE EKGGSAAAAAAAAASGGAGSDNSVEHSDYRAKLSQIRQIYHTELEKYEQACNEFTTHVM 180
*****

PBX1_HUMAN NLLREQSRTRPISPKEIERMVSIIHRKFSSIQMLKQSTCEAVMILRSRFLDARRKRRNF 240
PBX1_MOUSE NLLREQSRTRPISPKEIERMVSIIHRKFSSIQMLKQSTCEAVMILRSRFLDARRKRRNF 240
*****

PBX1_HUMAN NKQATEILNEYFYSHLSNPYPSEEAKEELAKKCGITVSNWFGNKRIRYKKNIGKQFE 300
PBX1_MOUSE NKQATEILNEYFYSHLSNPYPSEEAKEELAKKCGITVSNWFGNKRIRYKKNIGKQFE 300
*****

PBX1_HUMAN EANIYAAKTAVTATNVAHGSQANSPSTPNSAGSSSFNMSNSGDLFMSVQSLNGDSYQG 360
PBX1_MOUSE EANIYAAKTAVTATNVAHGSQANSPSTPNSAGSSSFNMSNSGDLFMSVQSLNGDSYQG 360
*****

PBX1_HUMAN AQVGANVQSQVDTLRHVISQTGGYSDGLAASQMYSPQGISANGGWQDATTPSSVTSPTTEG 420
PBX1_MOUSE AQVGANVQSQVDTLRHVISQTGGYSDGLAASQMYSPQGISANGGWQDATTPSSVTSPTTEG 420
*****

PBX1_HUMAN PGSVHSDTSN 430
PBX1_MOUSE PGSVHSDTSN 430
*****

```

B

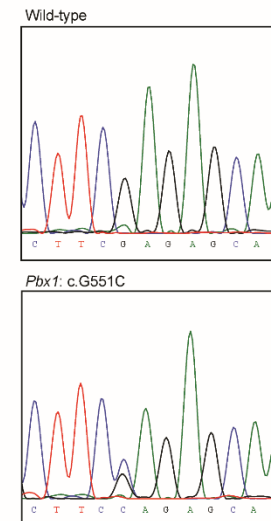

Supplementary figure 1. (A) Amino acid sequence conservation between human and mouse PBX1. The 430 amino acid protein is completely conserved between the two species. Residue R184 is indicated in *red*. (B) Sanger sequencing of the founder PBX1-R184P mouse created by Crispr-Cas9. Nucleotide change *Pbx1*:c.551G>C is observed in the founder and not present in wild-type, unaltered mice.

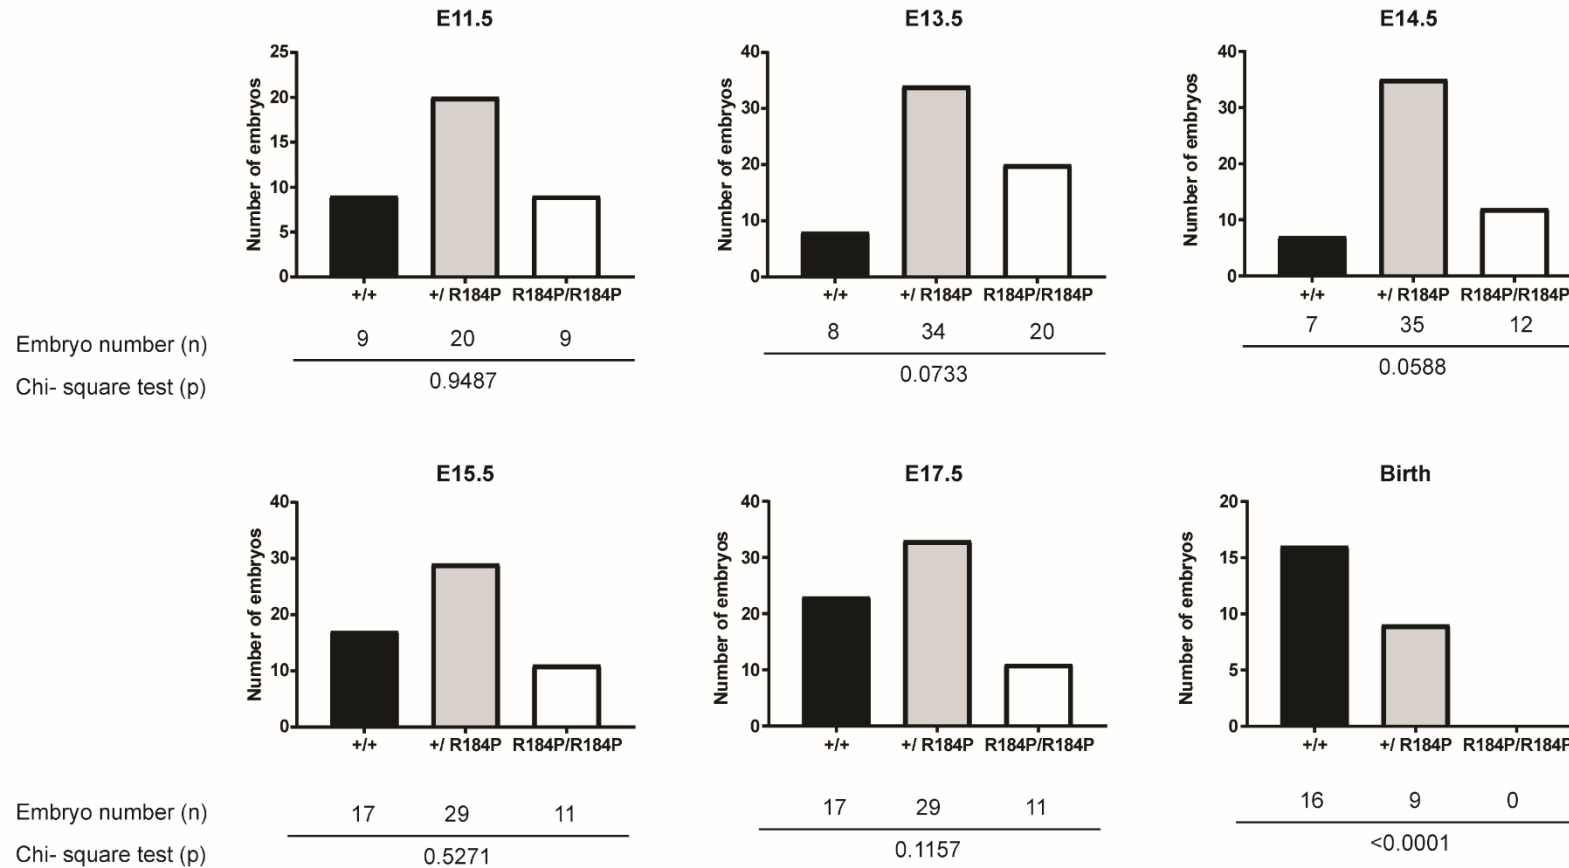

Supplementary figure 2. Mendelian ratios observed in embryos derived from matings between heterozygous males and heterozygous females at six stages of development (E11.5, E13.5, E14.5, E15.5, E17.5 and birth). Chi-square test was performed to detect deviations from expected versus observed numbers of embryos for wild-type (+/+), heterozygous (+/R184P) and homozygous (R184P/R184P) genotypes.



Embryonic body weights

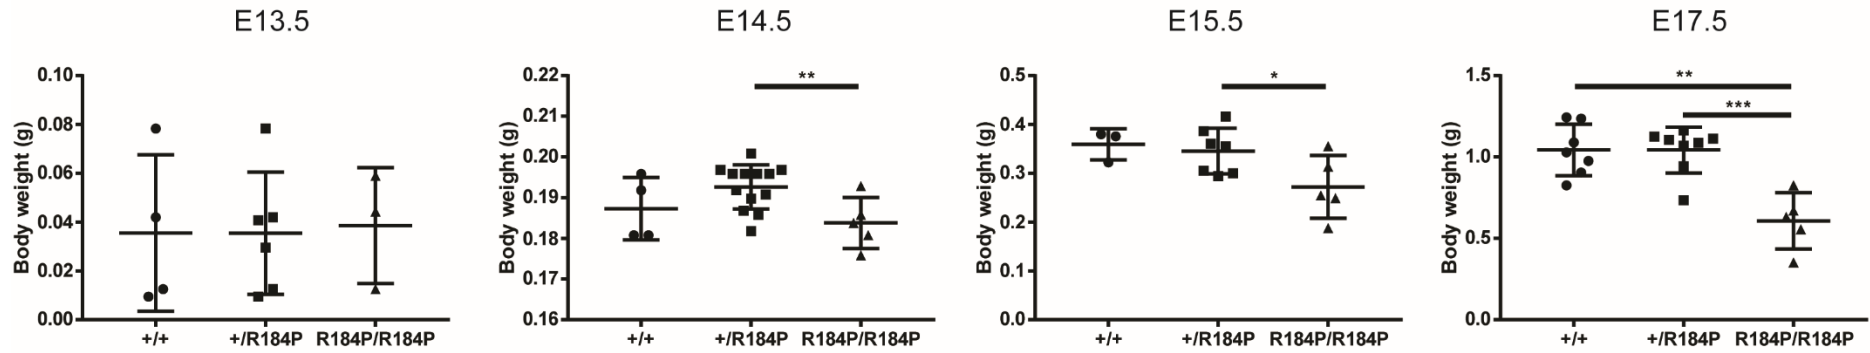

Embryonic body volumes

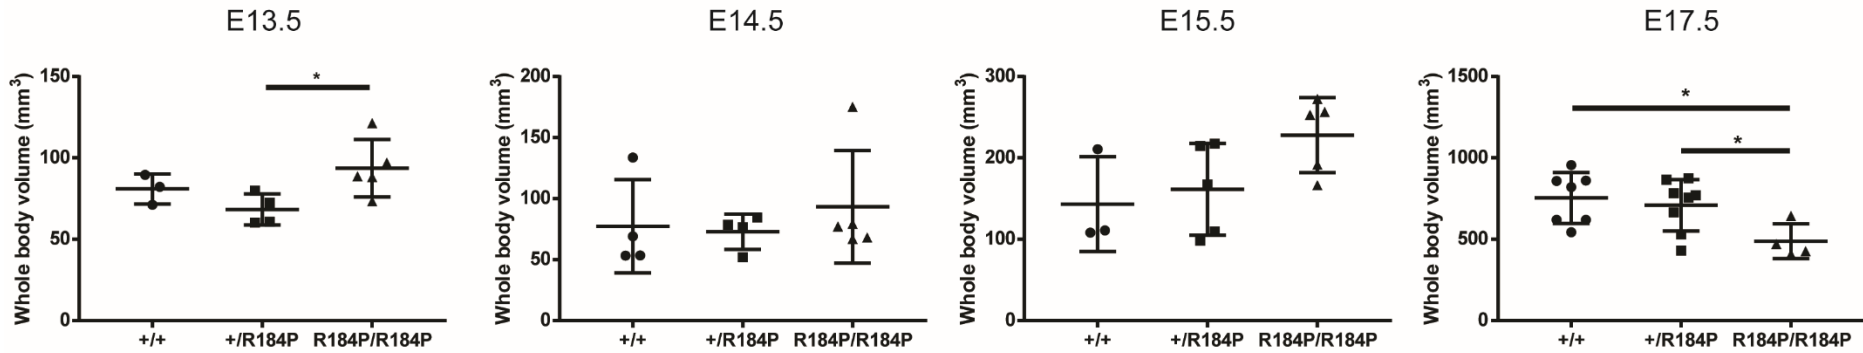

Supplementary figure 3. Embryonic body weights and body volumes of the wild-type, heterozygous and homozygous embryos at four stages of development (E13.5, E14.5, E15.5 and E17.5). (n ≥ 12 per stage, \* p < 0.05, \*\* p < 0.01, \*\*\* p < 0.001)

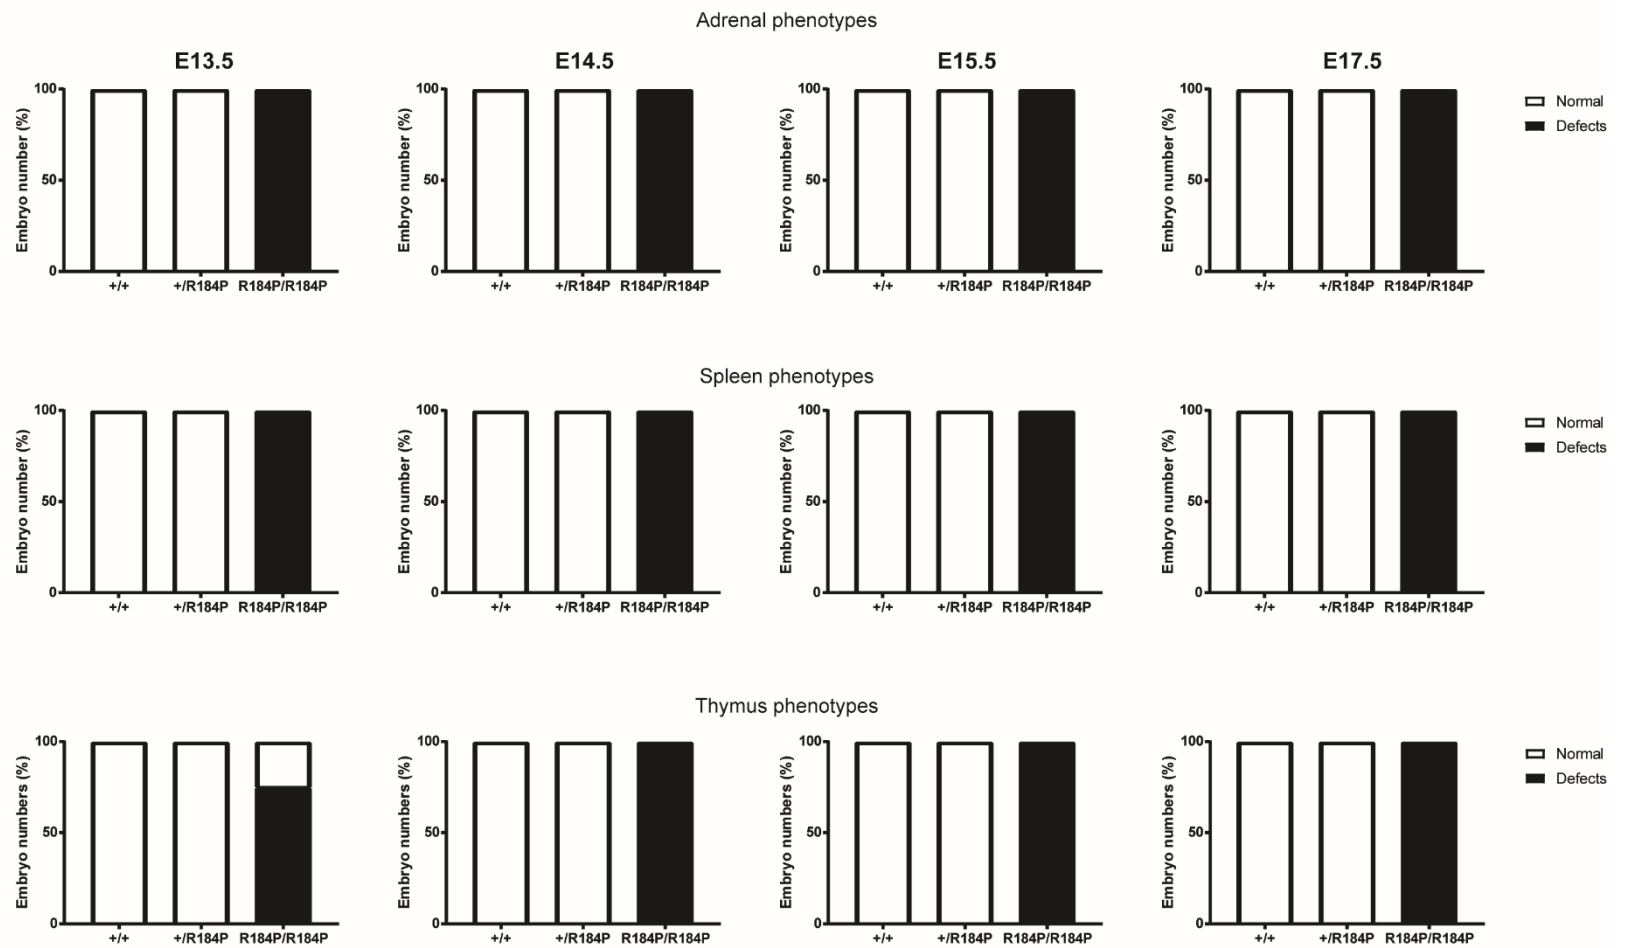

Supplementary figure 4. R184P/R184P homozygous embryos exhibited abnormal adrenal glands, spleen and thymi. Adrenal glands and spleen were aplastic. Thymi were absent or ectopic. Defects in these organs were not observed in wild-type or heterozygous embryos. (n ≥ 15 per stage).

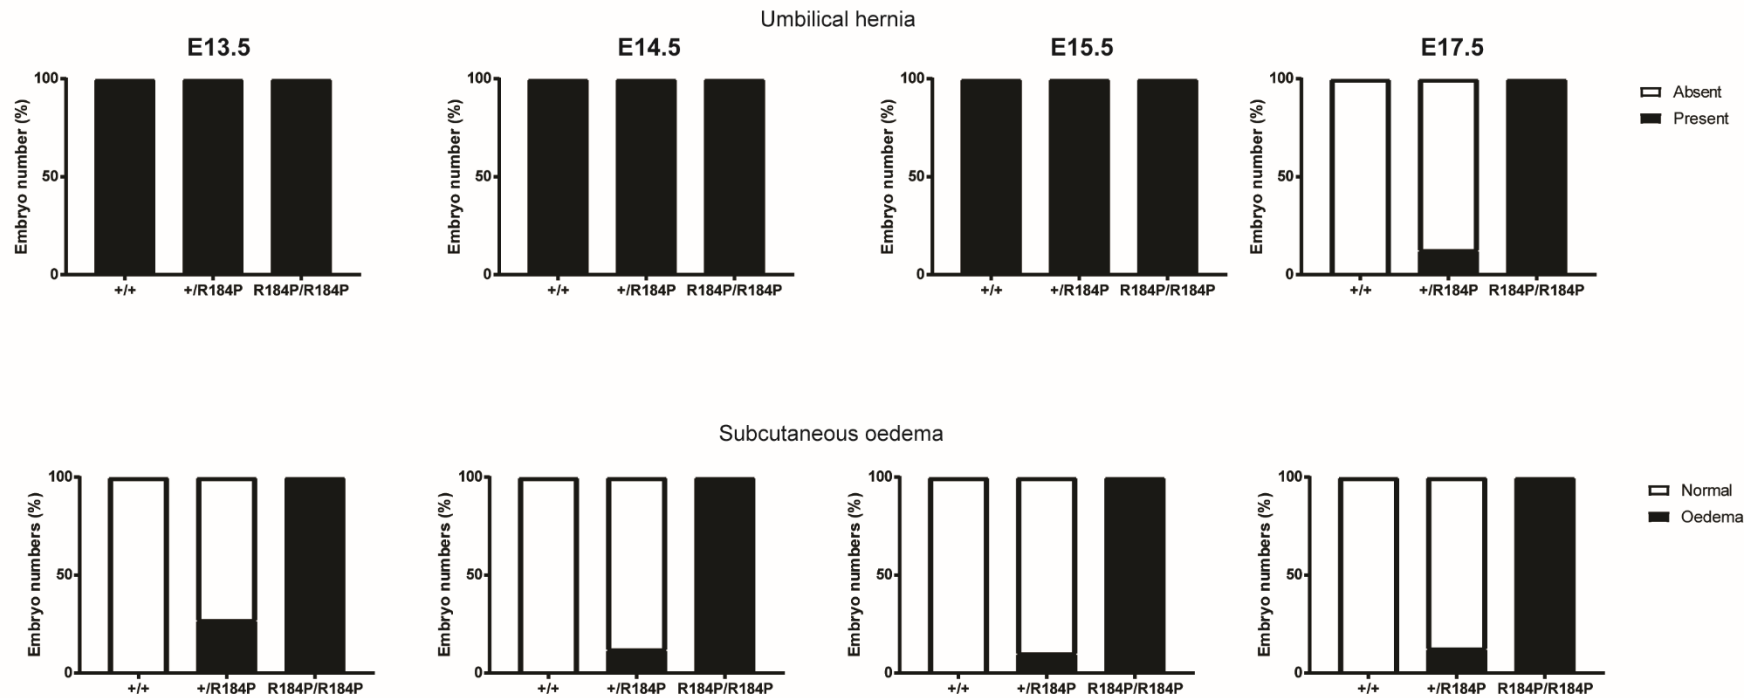

Supplementary figure 5. Umbilical hernia was observed in wild-type, heterozygous and homozygous embryos at E13.5, E14.5 and E15.5. At E17.5, wild-type embryos no longer exhibited umbilical hernia. 12.5% of heterozygous embryos had umbilical hernia. All homozygous embryos continued to exhibit umbilical hernia. Subcutaneous oedema was observed in 27% of heterozygous embryos at E13.5, 12% at E14.5, 10% at E15.5, and 12.5% at E17.5. All homozygous embryos displayed subcutaneous oedema at all stages analysed. This phenotype was not observed in any wild-type embryos analysed. (n ≥ 15 per stage).

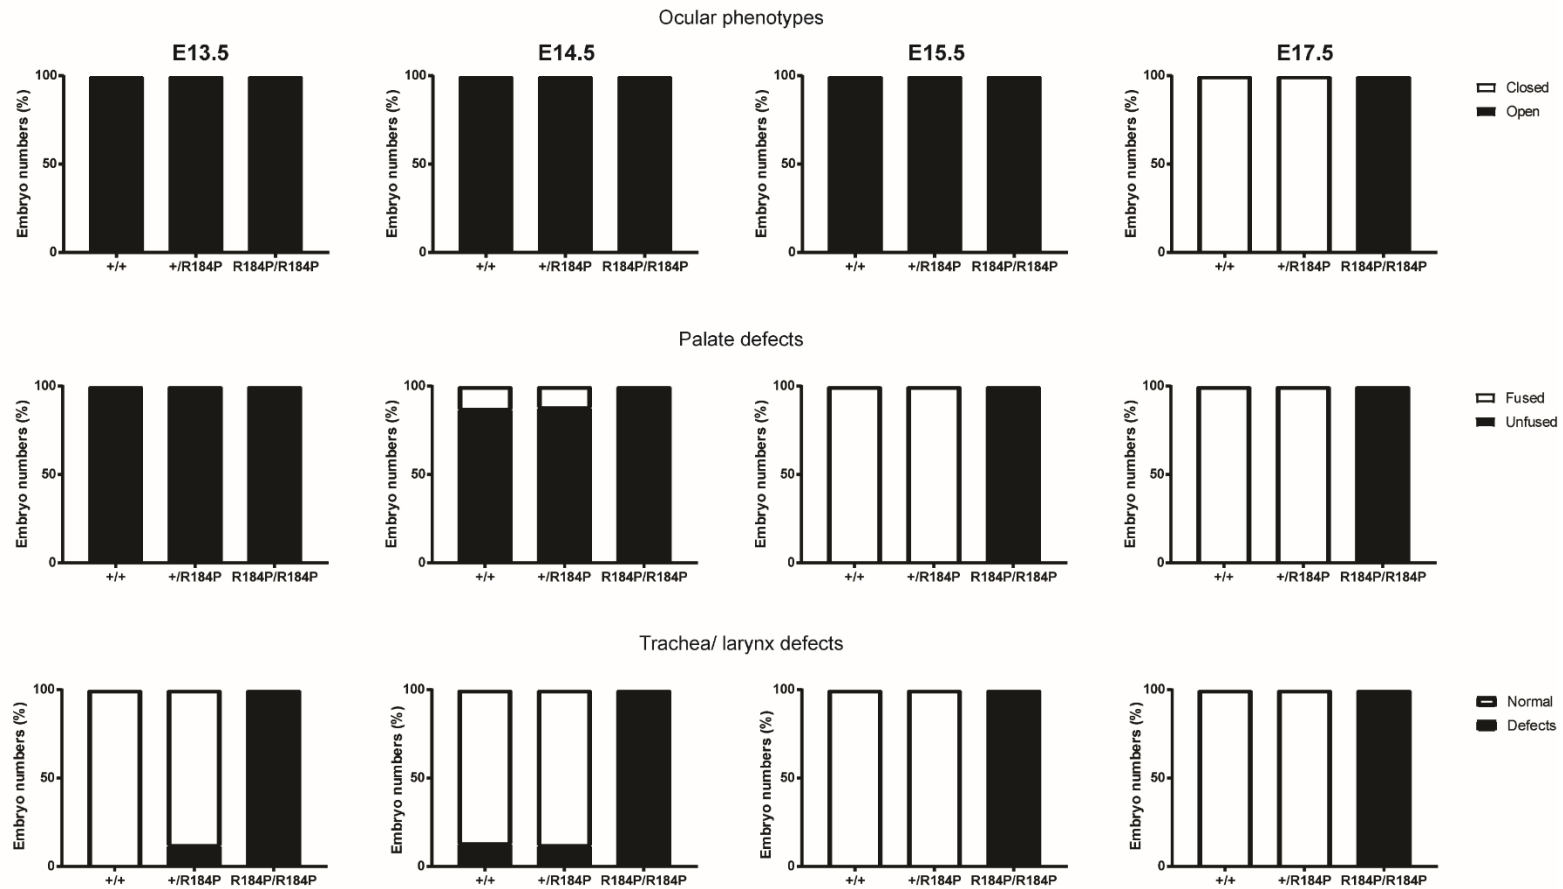

Supplementary figure 6. Eyes stay open in wild-type, heterozygous and homozygous embryos at E13.5, E14.5 and E15.5. At E17.5, wild-type and heterozygous embryos have closed eyes. At this stage, the homozygous embryos continue to display open eyes. At E13.5, all wild-type, heterozygous and homozygous embryos had unfused secondary palatal shelves. At E14.5, 13% of wild-type and 12% of heterozygous embryos had fused palatal shelves. At E15.5 and at E17.5, all wild-type and heterozygous embryos had fused palatal shelves. Homozygous embryos at these stages continued to exhibit unfused palatal shelves. In homozygous embryos, trachea were atretic at all stages. The larynx

was atretic until E17.5. In heterozygous embryos, 12% had atretic larynx at E13.5 and E14.5, and were normal at E15.5 and E17.5. Atretic larynx were observed in 13% of wild-type embryos at E14.5 and at no other stages. (n ≥ 14 per stage).

## References

- 1 Slavotinek, A., Risolino, M., Losa, M., Cho, M.T., Monaghan, K.G., Schneidman-Duhovny, D., Parisotto, S., Herkert, J.C., Stegmann, A.P.A., Miller, K. *et al.* (2017) De novo, deleterious sequence variants that alter the transcriptional activity of the homeoprotein PBX1 are associated with intellectual disability and pleiotropic developmental defects. *Human molecular genetics*, **26**, 4849-4860.
- 2 Eozenou, C., Bashamboo, A., Bignon-Topalovic, J., Merel, T., Zwermann, O., Lourenco, D., Lottmann, H., Lichtenauer, U., Rojo, S., Beuschlein, F. *et al.* (2019) The TALE homeodomain of PBX1 is involved in human primary testis-determination. *Human mutation*, in press.
- 3 Riedhammer, K.M., Siegel, C., Alhaddad, B., Montoya, C., Kovacs-Nagy, R., Wagner, M., Meitinger, T. and Hoefele, J. (2017) Identification of a Novel Heterozygous De Novo 7-bp Frameshift Deletion in PBX1 by Whole-Exome Sequencing Causing a Multi-Organ Syndrome Including Bilateral Dysplastic Kidneys and Hypoplastic Clavicles. *Frontiers in pediatrics*, **5**, 251.
- 4 Heidet, L., Moriniere, V., Henry, C., De Tomasi, L., Reilly, M.L., Humbert, C., Alibeu, O., Fourrage, C., Bole-Feysot, C., Nitschke, P. *et al.* (2017) Targeted Exome Sequencing Identifies PBX1 as Involved in Monogenic Congenital Anomalies of the Kidney and Urinary Tract. *Journal of the American Society of Nephrology : JASN*, **28**, 2901-2914.
- 5 Le Tanno, P., Breton, J., Bidart, M., Satre, V., Harbuz, R., Ray, P.F., Bosson, C., Dieterich, K., Jaillard, S., Odent, S. *et al.* (2017) PBX1 haploinsufficiency leads to syndromic congenital anomalies of the kidney and urinary tract (CAKUT) in humans. *Journal of medical genetics*, **54**, 502-510.
